# Supplementary material for: Disparate bone anabolic cues activate bone formation by regulating the rapid lysosomal degradation of sclerostin protein
Source: eLife. 2021 Mar 29;10:e64393. doi: 10.7554/eLife.64393 (PMC8032393; doi:10.7554/eLife.64393)
Supplement: Source data 1. — Each tab of the excel references a different figure. [file elife-64393-data1.xlsx]

## Sheet: Figure 1
	1B - Sclerostin			1B - pCaMKII				1C - Sclerostin			1C - pCaMKII			1D - Sclerostin				1D - pCaMKII
	-	+		-	+			-	+		-	+		-	+			-	+
	1	0.3481		0.757834	1.75166			1	0.294941		1.04829	2.01121		0.842367	0.935341			1	1.08115
	1	0.411849		0.991293	1.71427			1	0.36188		0.900638	3.01331		0.461196	0.625066			1	3.46275
	1	0.44486		1.25087	1.26769			1	0.773445		1.05107	3.34493		0.479979	0.177921			1	4.65133
	1	0.25187		Table Analyzed	Ocy454 FSS pCaMKII						Table Analyzed	UMR pCaMKII		2.17771	0.756075			1	2.77113
														0.90861	0.241649			1	4.81374
	Unpaired t test			Unpaired t test				Unpaired t test			Unpaired t test			1.29141	0.149174
	P value	<0.0001		P value	0.0519			P value	0.0249		P value	0.0114		1.44054	0.466026			Unpaired t test
	P value summary	****		P value summary	ns			P value summary	*		P value summary	*		1.24583	0.273949			P value	0.0087
	Significantly different (P < 0.05)?	Yes		Significantly different (P < 0.05)?	No			Significantly different (P < 0.05)?	Yes		Significantly different (P < 0.05)?	Yes		0.694184	0.505508			P value summary	**
	One- or two-tailed P value?	Two-tailed		One- or two-tailed P value?	Two-tailed			One- or two-tailed P value?	Two-tailed		One- or two-tailed P value?	Two-tailed		0.458167	0.943869			Significantly different (P < 0.05)?	Yes
	t, df	t=14.97, df=6		t, df	t=2.741, df=4			t, df	t=3.498, df=4		t, df	t=4.431, df=4						One- or two-tailed P value?	Two-tailed
														Unpaired t test				t, df	t=3.449, df=8
														P value	0.0228
														P value summary	*
														Significantly different (P < 0.05)?	Yes
														One- or two-tailed P value?	Two-tailed
														t, df	t=2.490, df=18

## Sheet: Figure 2
	2A - Sclerostin							2B - Sclerostin			2C - pCaMKII
	-	+	-	+	-	+		-	+		-	+	-	+	-	+
	1	0.695123	1	0.756566	1	0.512814		1	0.853599		1	1.65731	1	1.76828	1	1.4611
	1	1.27409	1	0.473374	1	0.16965		1	0.193924		1	1.93542	1	2.01539	1	1.36474
	1	0.780627			1	0.152308		1	0.716124		1	1.21594	1	3.14471	1	0.452533
								1	0.117031		1	1.34271	1	1.05566	1	1.27857
								1	0.78218		1	0.757238	1	1.70513	1	0.997679
	Holm-Šídák's multiple comparisons test	Predicted (LS) mean diff.	Below threshold?	Summary	Adjusted P Value			1	0.764168		1	2.64233	1	1.27387	1	1.24062
													1	1.37671	1	0.945482
	Vehicle - PTH							Unpaired t test					1	1.10835	1	0.663879
	10min	0.08339	No	ns	0.5603			P value	0.0091
	20min	0.385	No	ns	0.0602			P value summary	**		Holm-Šídák's multiple comparisons test	Predicted (LS) mean diff.	Below threshold?	Summary
	30min	0.7217	Yes	***	0.0009			Significantly different (P < 0.05)?	Yes
								One- or two-tailed P value?	Two-tailed		Veh - PTH
								t, df	t=3.223, df=10		5	-0.5918	Yes	*	0.0307
											10	-0.681	Yes	**	0.0036
											20	-0.05057	No	ns	0.7928

## Sheet: Figure 3
		3A - Sclerostin Degradation Assay																							3B - Sclerostin PTH and Baf
		DMSO						Bafilomycin A1						Brefeldin A						MG-132					-	+	-	+
		1	1	1	1	1	1	1	1	1				1	1	1				1	1	1			1	0.591731	1	0.862956
		0.748146	0.438782	0.469116	0.609317	0.432083	0.925956	0.961939	1.30624	0.85129				0.984728	0.785615	0.728421				0.899928	1.07587	1.07433			1	0.571701	1	0.829075
		0.5837	0.8876	0.354399	0.748414	0.616855	0.778417	1.69772	0.694399	1.05277				1.00968	0.701445	0.867205				0.788353	0.420447	0.825536			1	0.697751	1	0.757121
		Holm-Šídák's multiple comparisons test	Predicted (LS) mean diff.	Below threshold?	Summary	Adjusted P Value																			Holm-Šídák's multiple comparisons test	Mean Diff.	Below threshold?	Summary	Adjusted P Value
		No Flow																							DMSO:Vehicle vs. DMSO:PTH	0.3796	Yes	****	<0.0001
		DMSO vs. Bafilomycin A1	0	No	ns	>0.9999																			DMSO:Vehicle vs. Bafilomycin A1:Vehicle	0	No	ns	>0.9999
		DMSO vs. Brefeldin A	0	No	ns	>0.9999																			DMSO:Vehicle vs. Bafilomycin A1:PTH	0.1836	Yes	**	0.0025
		DMSO vs. MG-132	0	No	ns	>0.9999																			DMSO:PTH vs. Bafilomycin A1:Vehicle	-0.3796	Yes	****	<0.0001
																									DMSO:PTH vs. Bafilomycin A1:PTH	-0.196	Yes	**	0.0022
		Immediately																							Bafilomycin A1:Vehicle vs. Bafilomycin A1:PTH	0.1836	Yes	**	0.0025
		DMSO vs. Bafilomycin A1	-0.4359	Yes	**	0.0086
		DMSO vs. Brefeldin A	-0.229	No	ns	0.1
		DMSO vs. MG-132	-0.4128	Yes	**	0.0089
		35 Min
		DMSO vs. Bafilomycin A1	-0.4867	Yes	**	0.0031
		DMSO vs. Brefeldin A	-0.1979	No	ns	0.2827
		DMSO vs. MG-132	-0.01655	No	ns	0.9034

## Sheet: Figure 4
4D - p62			4D - LC3			4E - p62			4E - LC3				4F -Magic Red			4G - p62						4H - p62
-	+		-	+		-	+		-	+			-	+		-	+	-	+			-	+	-	+
1	1.32089		1	1.20469		1	1.35186		1	1.35186			3294.8	4947.72		1	1.34757	1	1.28452			1	1.25118	1	0.969441
1	1.4843		1	1.03691		1	1.08533		1	1.08533			3484.53	6577.54		1	2.74196	1	0.961009			1	1.11859	1	1.02061
1	1.23248		1	1.10062		1	1.04913		1	1.04913			4025.64	5914.53		1	2.50495	1	0.985598			1	1.19327	1	0.836543
1	2.47002		1	1.30192		1	1.33848		1	1.33848			4384.44	5557.47
						1	0.917941		1	0.917941			5488.3	5878.3		Number of families	1					Number of families	1
						1	1.3095		1	1.3095			5526.08	6439.15		Number of comparisons per family	3					Number of comparisons per family	3
Unpaired t test			Unpaired t test			1	1.24252		1	1.24252			6232.69	5182.7		Alpha	0.05					Alpha	0.05
P value	0.0286		P value	0.0328		1	1.34496		1	1.34496			5195.52	6825.07
P value summary	*		P value summary	*									5782.65	6355.43		Holm-Šídák's multiple comparisons test	Mean Diff.	Below threshold?	Summary	Adjusted P Value		Holm-Šídák's multiple comparisons test	Mean Diff.	Below threshold?	Summary	Adjusted P Value
Significantly different (P < 0.05)?	Yes		Significantly different (P < 0.05)?	Yes		Unpaired t test			Unpaired t test							- vs. +	-1.198	Yes	*	0.0151		- vs. +	-0.1877	Yes	**	0.0083
One- or two-tailed P value?	Two-tailed		One- or two-tailed P value?	Two-tailed		P value	0.0036		P value	0.0036			Unpaired t test			- vs. +	-0.07704	No	ns	0.812		- vs. +	0.0578	No	ns	0.2568
t, df	t=2.761, df=6		t, df	t=2.761, df=6		P value summary	**		P value summary	**			P value	0.0138		+ vs. +	1.121	Yes	*	0.0151		+ vs. +	0.2455	Yes	**	0.0025
						Significantly different (P < 0.05)?	Yes		Significantly different (P < 0.05)?	Yes			P value summary	*
						One- or two-tailed P value?	Two-tailed		One- or two-tailed P value?	Two-tailed			Significantly different (P < 0.05)?	Yes
						t, df	t=3.498, df=14		t, df	t=3.498, df=14			One- or two-tailed P value?	Two-tailed
													t, df	t=2.764, df=16

## Sheet: Figure 5
	5A - Sclerostin			5A - pCaMKII			5B - Sclerostin						5C - p62							5C - Sclerostin
	-	+		-	+		-	+	-	+			-	+	-	+				-	+	-	+
	1.23691	0.419547		1.0775	0.82474		1	0.640203	1	0.876816			1	2.08121	1	1.07761				1	0.811506	1	1.28406
	0.886073	0.337488		0.947452	0.958338		1	0.76351	1	1.08556			1	1.29774	1	1.18591				1	0.637338	1	1.29298
	0.877014	0.614181		0.975053	1.24682				1	1.20253			1	1.34089	1	1.07132				1	0.862037	1	1.17464
	Unpaired t test			Unpaired t test			Holm-Šídák's multiple comparisons test	Predicted (LS) mean diff.	Below threshold?	Summary	Adjusted P Value		Holm-Šídák's multiple comparisons test	Mean Diff.	Below threshold?	Summary	Adjusted P Value			Holm-Šídák's multiple comparisons test	Mean Diff.	Below threshold?	Summary	Adjusted P Value
	P value	0.0197		P value	0.9429
	P value summary	*		P value summary	ns		DMSO:Vehicle vs. DMSO:SNP	0.2981	No	ns	0.051		NF:Vehicle vs. NF:L-NAME	0	No	ns	>0.9999			Vehicle:NF vs. Vehicle:F	0.2297	Yes	**	0.0094
	Significantly different (P < 0.05)?	Yes		Significantly different (P < 0.05)?	No		DMSO:Vehicle vs. Bafilomycin A1:Vehicle	0	No	ns	>0.9999		NF:Vehicle vs. F:Vehicle	-0.5733	Yes	*	0.0399			Vehicle:NF vs. LNAME:NF	0	No	ns	>0.9999
	One- or two-tailed P value?	Two-tailed		One- or two-tailed P value?	Two-tailed		DMSO:Vehicle vs. Bafilomycin A1:SNP	-0.05497	No	ns	0.8733		NF:Vehicle vs. F:L-NAME	-0.1116	No	ns	0.803			Vehicle:NF vs. LNAME:F	-0.2506	Yes	**	0.0094
	t, df	t=3.767, df=4		t, df	t=0.07627, df=4		DMSO:SNP vs. Bafilomycin A1:Vehicle	-0.2981	No	ns	0.051									Vehicle:F vs. LNAME:NF	-0.2297	Yes	**	0.0094
							DMSO:SNP vs. Bafilomycin A1:SNP	-0.3531	Yes	*	0.0268									Vehicle:F vs. LNAME:F	-0.4803	Yes	***	0.0001
							Bafilomycin A1:Vehicle vs. Bafilomycin A1:SNP	-0.05497	No	ns	0.8733									LNAME:NF vs. LNAME:F	-0.2506	Yes	**	0.0094

## Sheet: Figure 6
	6A - Sclerostin				6C - BFR					6D - MAR					6E - Sclerostin
	-	+			-	+	-	+		-	+	-	+		-	+	-	+
	1.50443	0.772977			0.0927253	0.237748	0.0067059	0.107156		0.991894	1.49893	0.244347	0.664382		1	0.669547	1	0.911505
	1.17384	0.629885			0.084906	0.128572	0.00858452	0.0337174		0.808998	1.1758	0.553531	0.432296		1	0.583876	1	1.20229
	0.618627	0.43469			0.0875869	0.129808	0.0874896	0.0137839		0.485328	0.869511	0.45356	0.377354		1	0.26465	1	1.00355
	1.07648	0.528603			0.0223876	0.43212	0.135401	0.126012		0.417215	1.55616	0.716323	0.921943		1	0.391184	1	2.04249
	1.05191	0.601561			0.0737463	0.0786922	0.0438444	0.0523202		0.265608	0.564675	0.216059	0.381074		1	1.37864	1	0.607348
	0.574713	0.772279			0.106194	0.244287	0.0214967	0.0122367		0.323609	0.807178	0.0913262	0.216434		1	1.65751	1	0.447586
					0.0138685	0.0394251	0.0164503	0.0810936		0.194245	0.31119	0.224372	0.492243		1	0.854815	1	0.33968
	Unpaired t test				0.0353863	0.0776883	0.0263992	0.0454191		0.218384	0.292019	0.171807	0.3435		1	0.384345	1	0.267404
	P value	0.0343			0.0626235	0.151423				0.439869	0.725359				1	0.0870928	1	0.365144
	P value summary	*			0.02599	0.317324				0.151648	1.34111				1	0.223044	1	0.314034
	Significantly different (P < 0.05)?	Yes													1	0.128108	1	2.21297
	One- or two-tailed P value?	Two-tailed			Holm-Šídák's multiple comparisons test	Predicted (LS) mean diff.	Below threshold?	Summary		Holm-Šídák's multiple comparisons test	Predicted (LS) mean diff.	Below threshold?	Summary		1	0.231227	1	0.620133
	t, df	t=2.450, df=10													1	0.269986
					Vehicle:Non-Loaded vs. Vehicle:Loaded	-0.1195	Yes	**		Vehicle:Non-Loaded vs. Vehicle:Loaded	-0.3282	Yes	*		1	1.19684
					Vehicle:Non-Loaded vs. Apocynin:Non-Loaded	0.03127	No	ns		Vehicle:Non-Loaded vs. Apocynin:Non-Loaded	0.1194	No	ns
					Vehicle:Non-Loaded vs. Apocynin:Loaded	0.012	No	ns		Vehicle:Non-Loaded vs. Apocynin:Loaded	-0.01831	No	ns		Dunn's multiple comparisons test	Mean rank diff.	Significant?	Summary	Adjusted P Value
					Vehicle:Loaded vs. Apocynin:Non-Loaded	0.1508	Yes	***		Vehicle:Loaded vs. Apocynin:Non-Loaded	0.4476	Yes	**		- vs. +	23.5	Yes	**	0.0078
					Vehicle:Loaded vs. Apocynin:Loaded	0.1315	Yes	**		Vehicle:Loaded vs. Apocynin:Loaded	0.3098	Yes	*		- vs. +	13.33	No	ns	0.3416
					Apocynin:Non-Loaded vs. Apocynin:Loaded	-0.01927	No	ns		Apocynin:Non-Loaded vs. Apocynin:Loaded	-0.1377	No	ns

## Sheet: Figure 7
	7B - BFR								7C - MAR							7D - Sclerostin							7E - Sclerostin
	-	+	-	+					-	+	-	+				-	+	-	+				-	+	-	+
	0.0465281	0.356904	0.0854186	0.25529					0.622908	0.947222	0.971862	0.925622				1	0.669547	1	1.18449				1	0.897547	3.12188	1.59852
	0.0401274	0.264187	0.00392874	0.127342					0.554501	0.646867	0.223332	0.576141				1	0.583876	1	0.352885				1	1.20658	2.83947	1.15469
	0.0474042	0.233496	0.0363145	0.0759818					0.416503	0.984425	0.411081	0.674689				1	0.26465	1	0.814232				1	1.05625	2.13837	0.823687
	0.207451	0.728165	0.0116933	0.0871515					0.59871	1.37488	0.446533	0.369111				1	0.391184	1	1.10679
	0.14555	0.110992	0.0184848	0.106281					0.458248	0.848454	0.429933	0.587682				1	1.37864	1	0.905766
	0.0810235	0.44285	0.0743337	0.177143					1.06942	1.17779	1.34396	0.745703				1	1.65751	1	3.3625				Holm-Šídák's multiple comparisons test	Mean Diff.	Below threshold?	Summary	Adjusted P Value
	0.0481344	0.115942	0.0908956	0.32048					0.623357	0.591041	0.52021	0.786421				1	0.854815	1	0.680134
																1	0.384345	1	0.560595				Control:Vehicle vs. Control:GCase	-0.05346	No	ns	0.8702
																1	0.0870928	1	0.896068				Control:Vehicle vs. Gaucher:Vehicle	-1.7	Yes	**	0.0013
	Non-Loaded - Loaded								Vehicle - Bafilomycin A1							1	0.223044	1	1.30077				Control:Vehicle vs. Gaucher:GCase	-0.1923	No	ns	0.8702
	Vehicle	-0.2338	-0.3676 to -0.09994	Yes	**	0.0016			Non-Loaded	-0.0004666	-0.3548 to 0.3539	No	ns	>0.9999		1	0.128108	1	0.681154				Control:GCase vs. Gaucher:Vehicle	-1.646	Yes	**	0.0014
	Bafilomycin A1	-0.1184	-0.2522 to 0.01545	No	ns	0.0848			Loaded	0.2722	-0.08214 to 0.6265	No	ns	0.1524		1	0.231227	1	0.430385				Control:GCase vs. Gaucher:GCase	-0.1388	No	ns	0.8702
																1	0.269986						Gaucher:Vehicle vs. Gaucher:GCase	1.508	Yes	**	0.002
	Vehicle - Bafilomycin A1								Non-Loaded - Loaded							1	1.19684
	Non-Loaded	0.04216	-0.1147 to 0.1990	No	ns	0.7768			Vehicle	-0.3181	-0.6151 to -0.02118	Yes	*	0.0359
	Loaded	0.1576	0.0006914 to 0.3144	Yes	*	0.0489			Bafilomycin A1	-0.04549	-0.3425 to 0.2515	No	ns	0.9115		Dunn's multiple comparisons test	Mean rank diff.	Significant?	Summary	Adjusted P Value
																- vs. +	23.5	Yes	**	0.0078
																- vs. +	9.917	No	ns	0.7189

## Sheet: Fig 1 Sup 1
		Sost IF
		-	+
		42.857	9.091
		58.824	38.095
		64.286	43.75
		62.5	28.571
		47.059	31.25
		64.286	33.333
		Unpaired t test
		P value	0.0018
		P value summary	**
		Significantly different (P < 0.05)?	Yes
		One- or two-tailed P value?	Two-tailed
		t, df	t=4.207, df=10

## Sheet: Fig 2 Sup 1 
		PTH mRNA
		-	+
		2.30322e-09	3.70155e-09
		1.14007e-09	2.423e-09
		8.7665e-10	2.87478e-09
		1.35482e-09	4.89644e-09
		9.94487e-10	1.80356e-09
		3.5435e-09	1.50454e-09
		Unpaired t test
		P value	0.1115
		P value summary	ns
		Significantly different (P < 0.05)?	No
		One- or two-tailed P value?	Two-tailed
		t, df	t=1.745, df=10
